# Supplementary material for: Avoiding irreversible 5-fluorocytosine hydration via supramolecular synthesis of pharmaceutical cocrystals
Source: Royal Society of Chemistry journal article supplement (doi:10.1039/c8nj02647e), 2018-01-01
Supplement: c8nj02647e1.pdf [file c8nj02647e1.pdf]

1

2 **Avoiding the Irreversible 5-Fluorocytosine Hydration via**  
3 **Supramolecular Synthesis of Pharmaceutical Cocrystals**

4 Matheus S. Souza<sup>1</sup>, Luan F. Diniz<sup>1</sup>, Lautaro Vogt<sup>1</sup>, Paulo S. Carvalho-Jr<sup>1</sup>, Richard F. D'  
5 Vries<sup>1,2</sup> and Javier Ellena<sup>1\*</sup>

6 <sup>1</sup>Instituto de Física de São Carlos, Universidade de São Paulo, CP 369, 13.560-970 –  
7 São Carlos, SP, Brazil.

8 <sup>2</sup>Facultad de Ciencias Básicas, Universidad Santiago de Cali, Calle 5 # 62-00, Cali,  
9 Valle del Cauca, Colombia.

10 \*Corresponding author: [javiere@ifsc.usp.br](mailto:javiere@ifsc.usp.br)

11

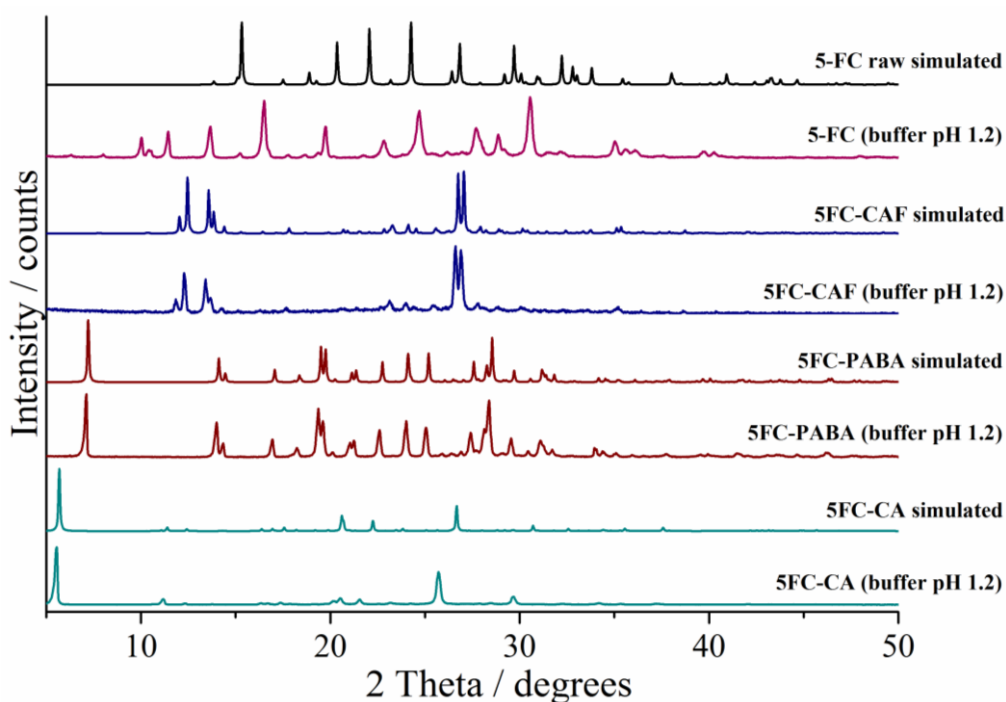

12

13 **Figure S1.** Experimental powder X-ray diffraction patterns of 5-FC and its cocrystals  
14 that remain non-solubilized after the solubility test.

15

16

17

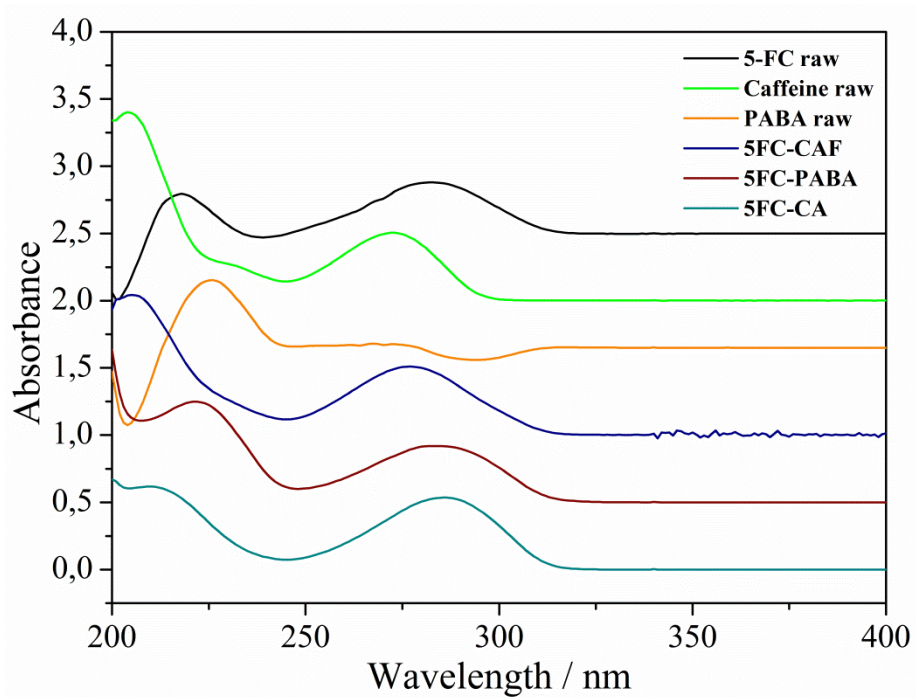

1

2 **Figure S2.** Absorption spectra of 5-FC  $0.0055 \text{ mg mL}^{-1}$ , caffeine  $0.0086 \text{ mg mL}^{-1}$ , *p*-  
 3 aminobenzoic acid  $0.0065 \text{ mg mL}^{-1}$ ; and the cocrystals 5FC-CAF  $0.016 \text{ mg mL}^{-1}$ , 5FC-  
 4 PABA  $0.013 \text{ mg mL}^{-1}$  and 5FC-CA  $0.016 \text{ mg mL}^{-1}$  in buffer pH = 1.2.

5

6

7

8

9

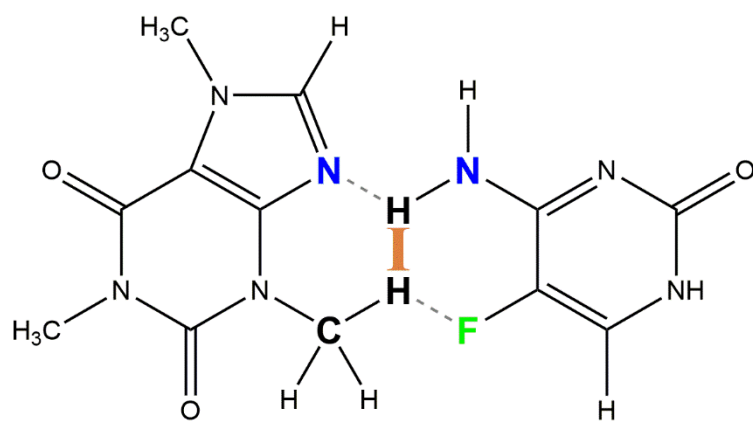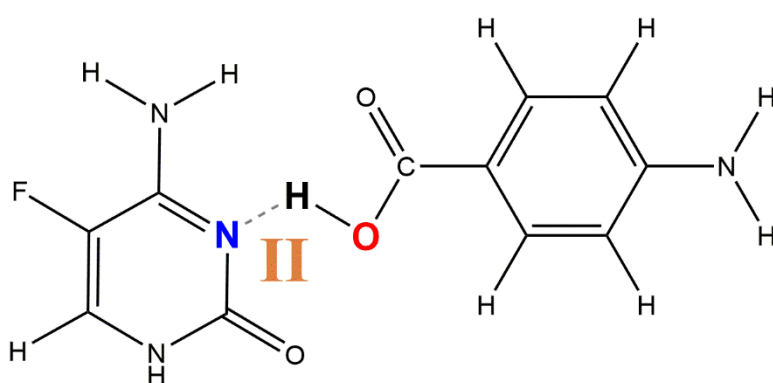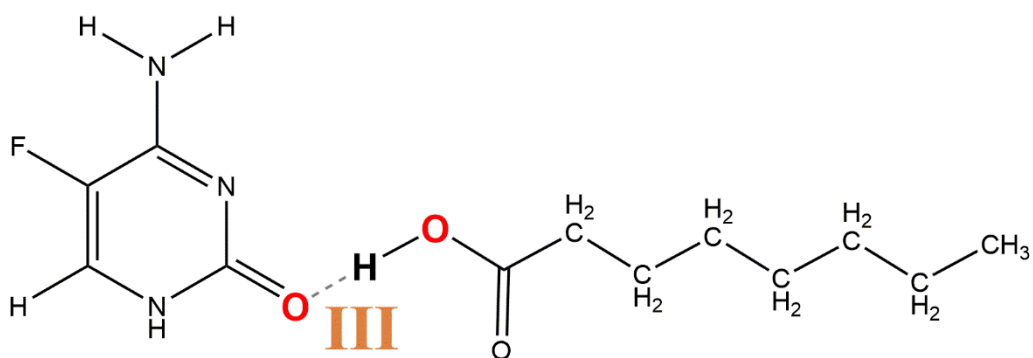

1

2

3 **Figure S3.** Heterosynths observed in the 5-FC cocrystals.

4

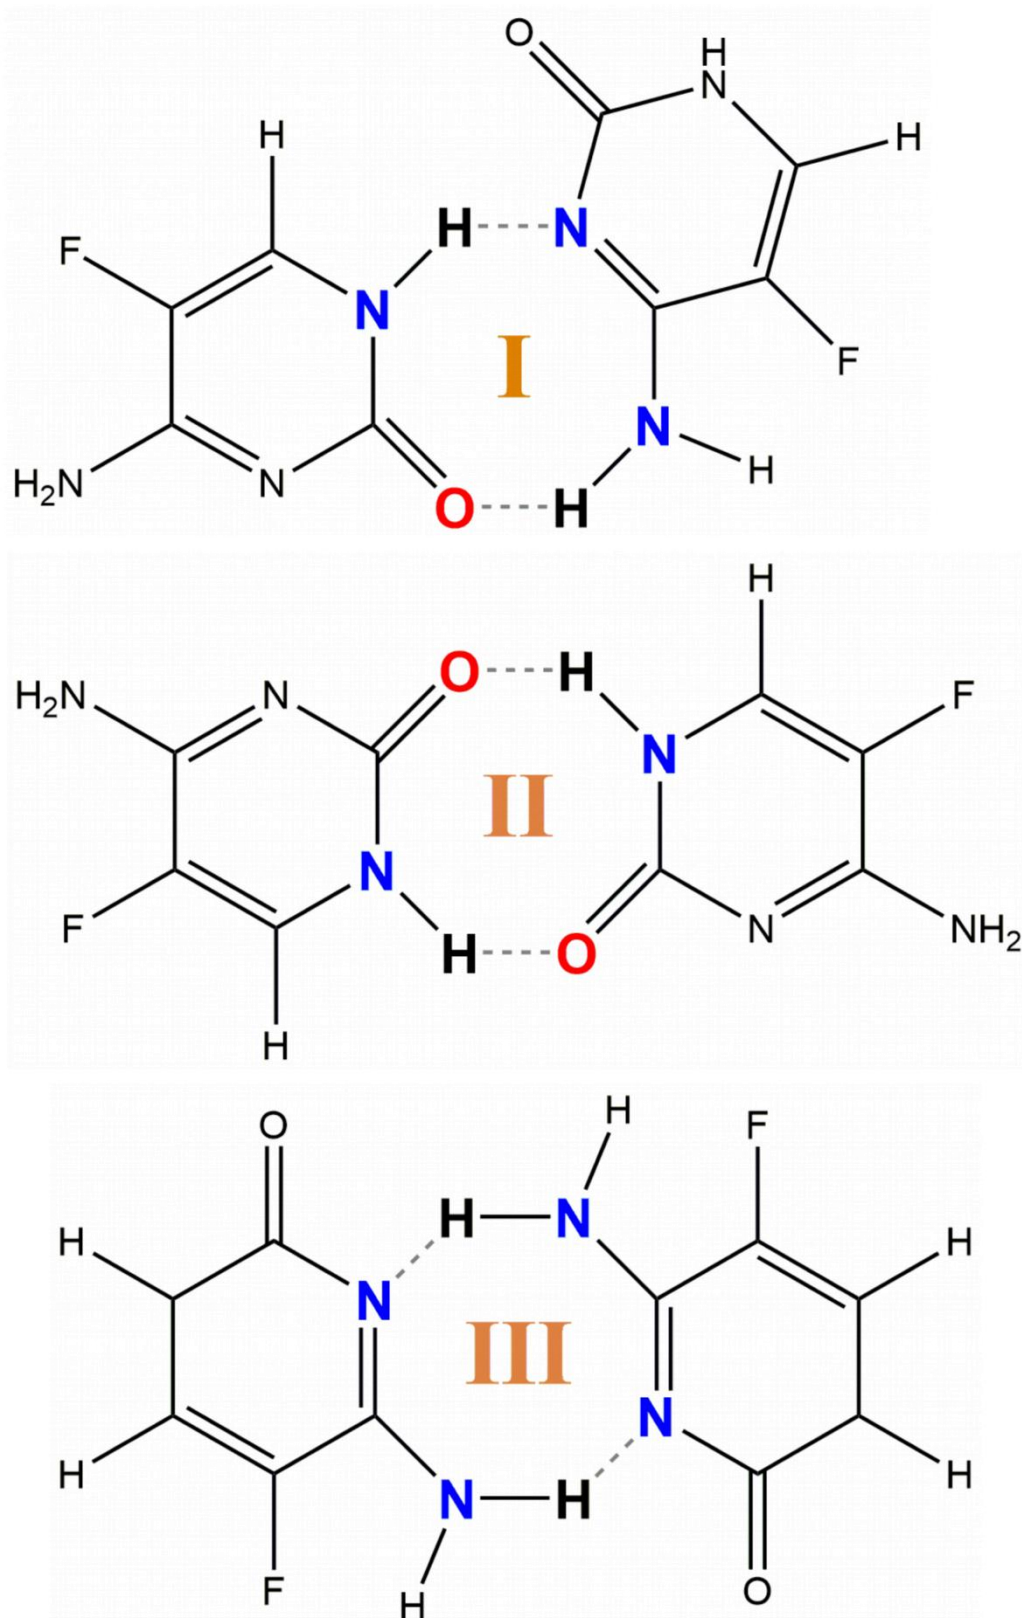

1  
2  
3  
4  
5

**Figure S4.** Homosynthons observed in the 5-FC cocrystals.

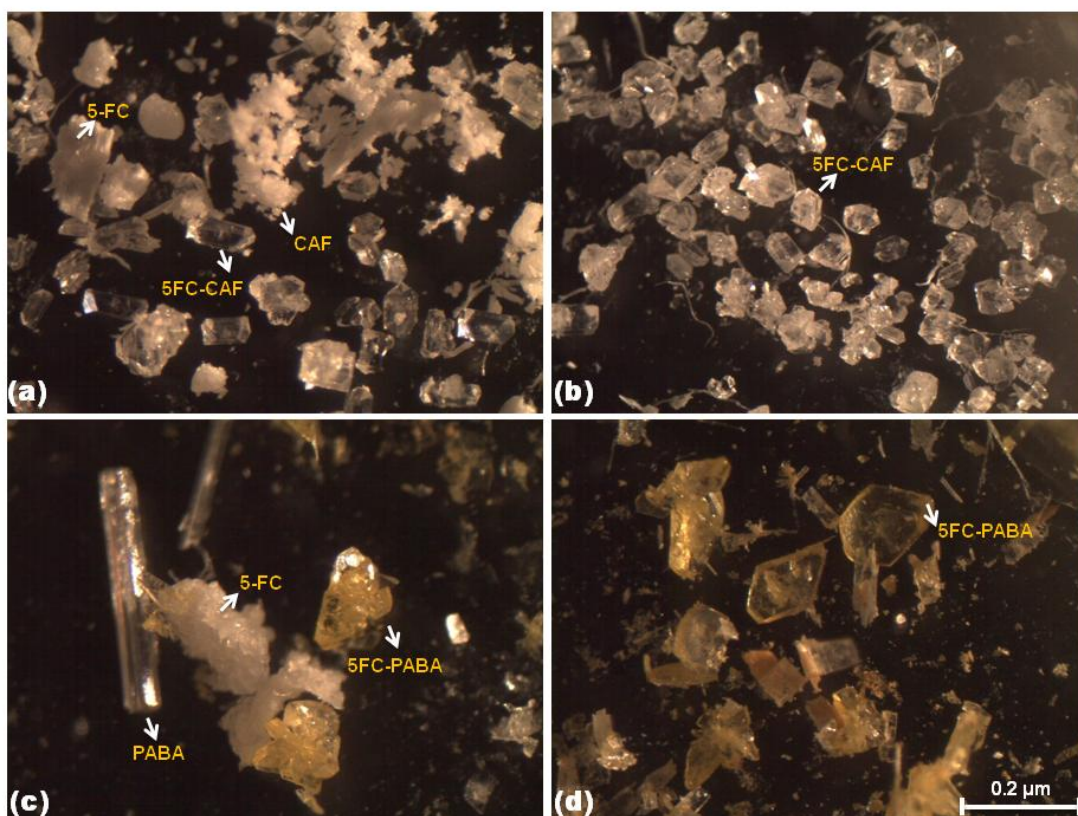

1  
2  
3  
4  
5  
6  
7  
8  
9  
10  
11  
12  
13  
14  
15  
16  
17  
18  
19

**Figure S5.** (a) and (c): Microscope images of crystalline phases with single-crystals of different habits obtained directly from SES method for 5FC-CAF and 5FC-PABA cocrystals, respectively. (b) and (d): Grinding products recrystallized through SES as a unique crystalline phase.

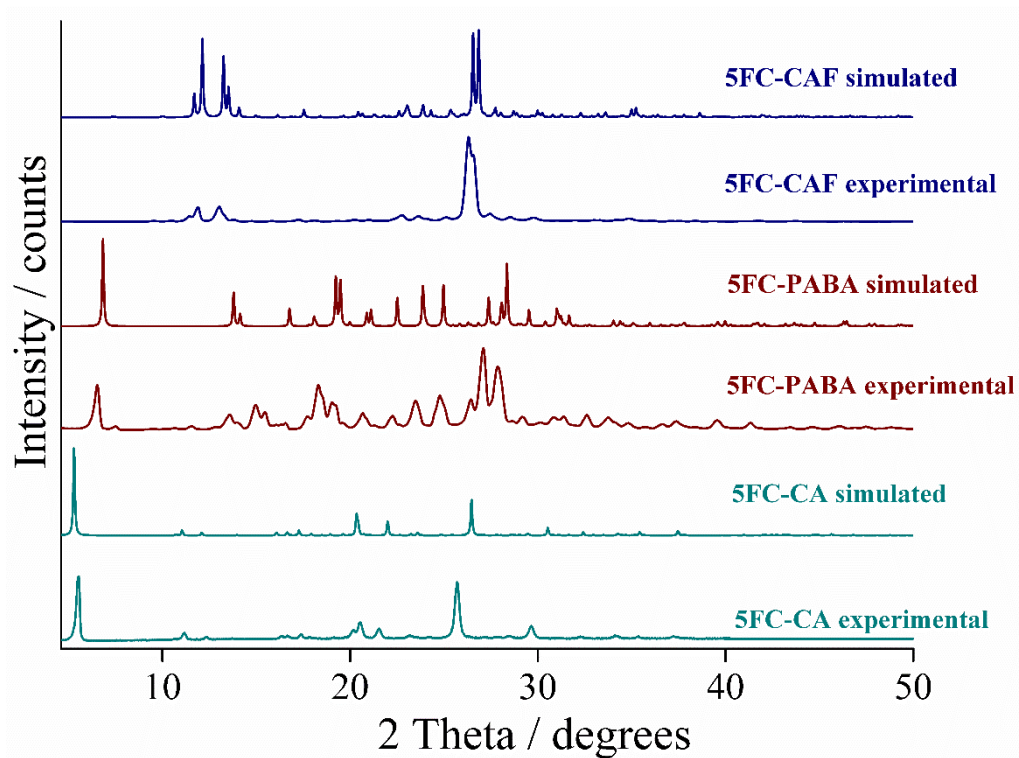

1  
2  
3  
4  
5  
6  
7  
8  
9  
10  
11  
12  
13  
14  
15  
16  
17  
18  
19  
20

**Figure S6.** Simulated and experimental powder X-ray diffraction patterns of 5-FC cocrystals. All diffractograms are in a good agreement indicating that the samples present high purity and representativeness.

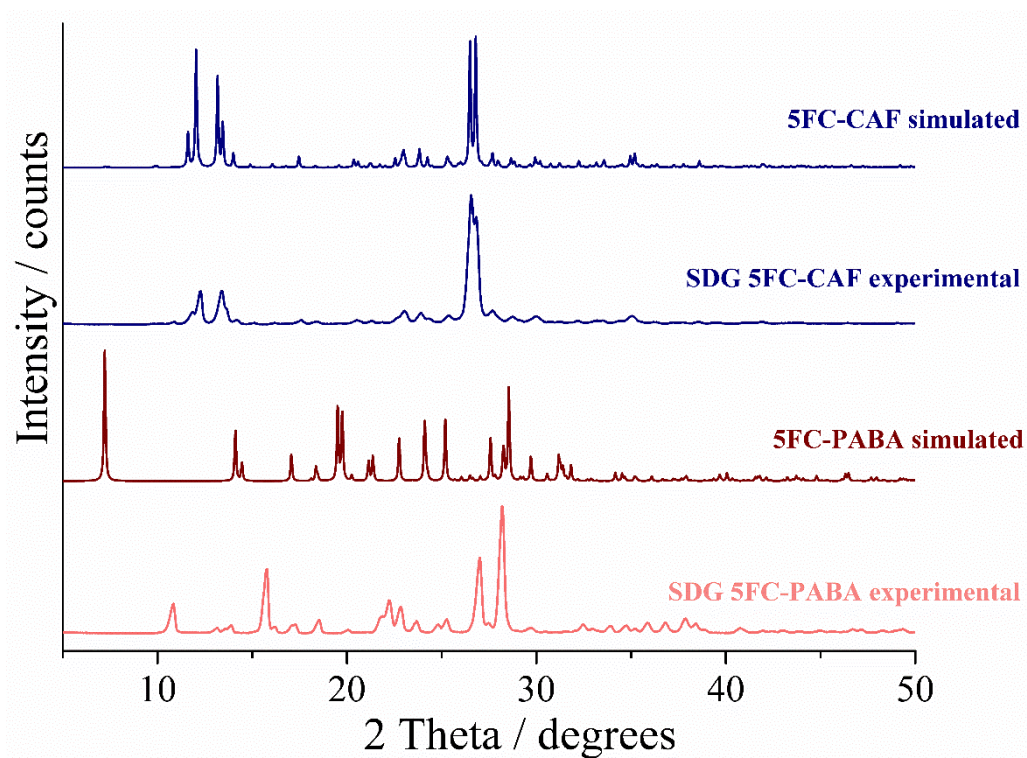

1

2 **Figure S7.** Experimental powder X-ray diffraction patterns of 5-FC cocrystals obtained  
3 from solvent-drop grinding (SDG) compared to simulated ones. Only the diffractograms  
4 of 5FC-PABA are not in a good agreement which suggest a possible physical mixture  
5 between the starting materials.

6

7

8

9

10

11

12

13

14

15

16

17

18

19

20

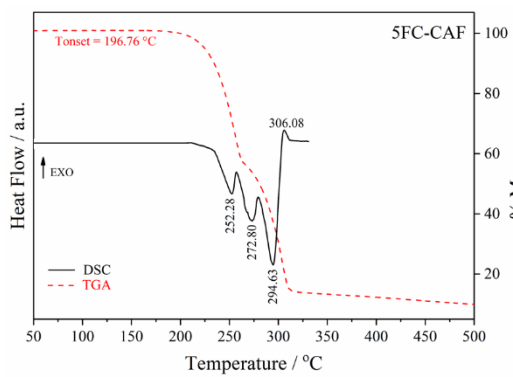

(a)

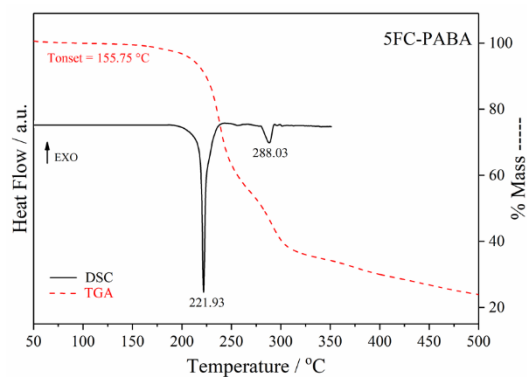

(b)

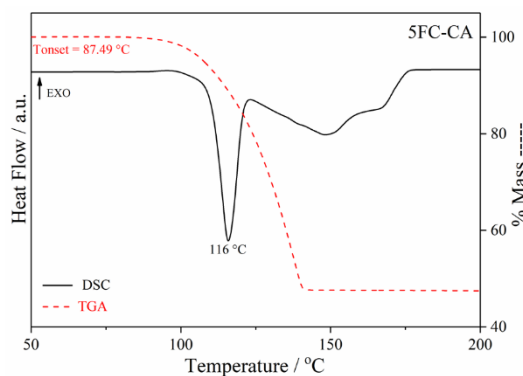

(c)

**Figure S8.** TGA and DSC curves of the 5-FC's cocrystals.

- 1
- 2
- 3
- 4
- 5
- 6
- 7
- 8
- 9
- 10
- 11
- 12
- 13
- 14
- 15
- 16



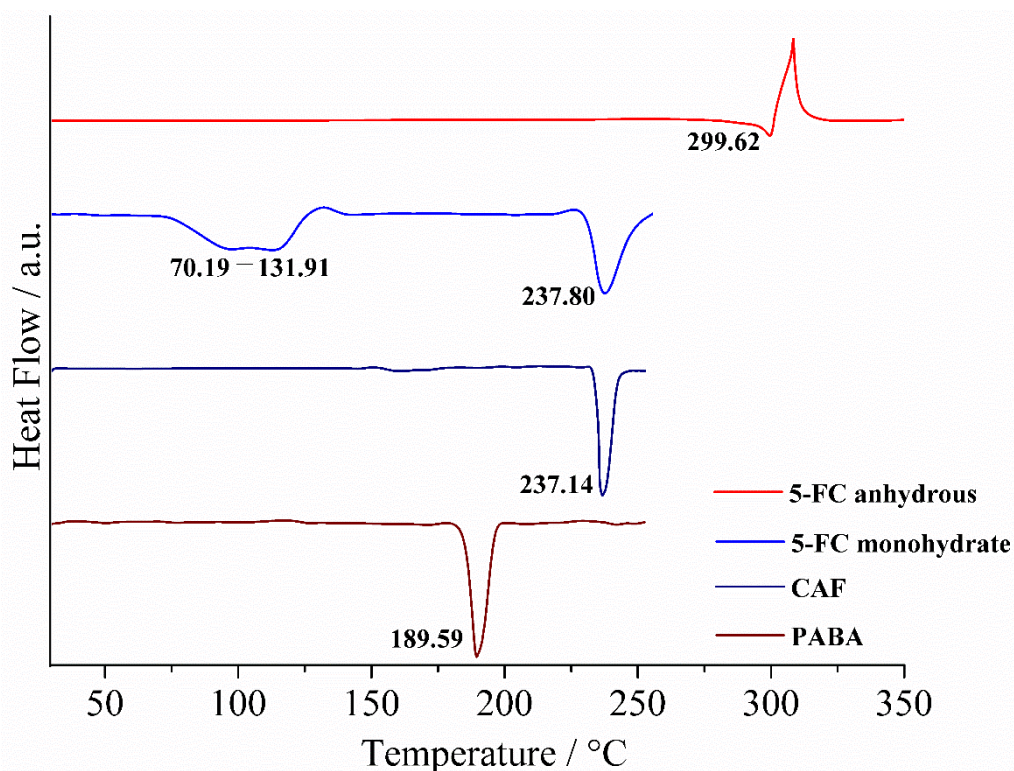

1

2 **Figure S9.** DSC curves of: (i) the raw material 5-Fluorocytosine (5-FC anhydrous); (ii)  
 3 the 5-FC after one week in environment with high relative humidity (5-FC  
 4 monohydrate) and (iii) the two solid coformers, namely: CAF (caffeine) and PABA (*p*-  
 5 aminobenzoic acid).

6

7

8

9

10

11

12

13

14

15

16

17

18

19

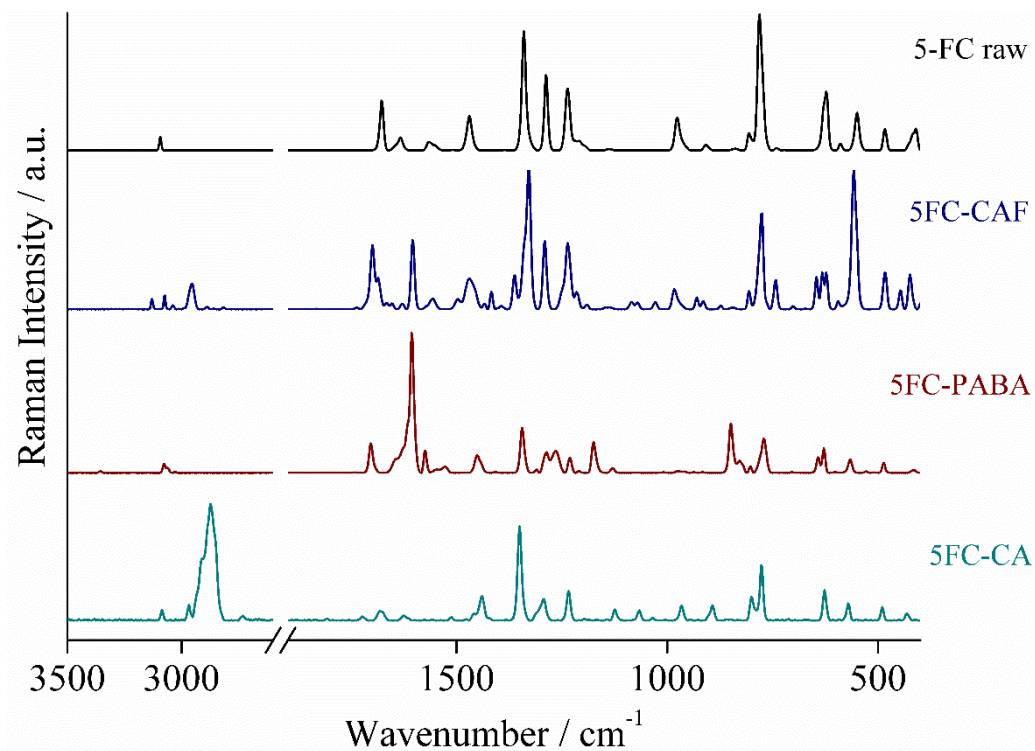

**Figure S10.** FT-Raman spectra of 5-FC and its cocrystals.

1  
2  
3  
4  
5  
6  
7  
8  
9  
10  
11  
12  
13  
14  
15  
16  
17  
18  
19

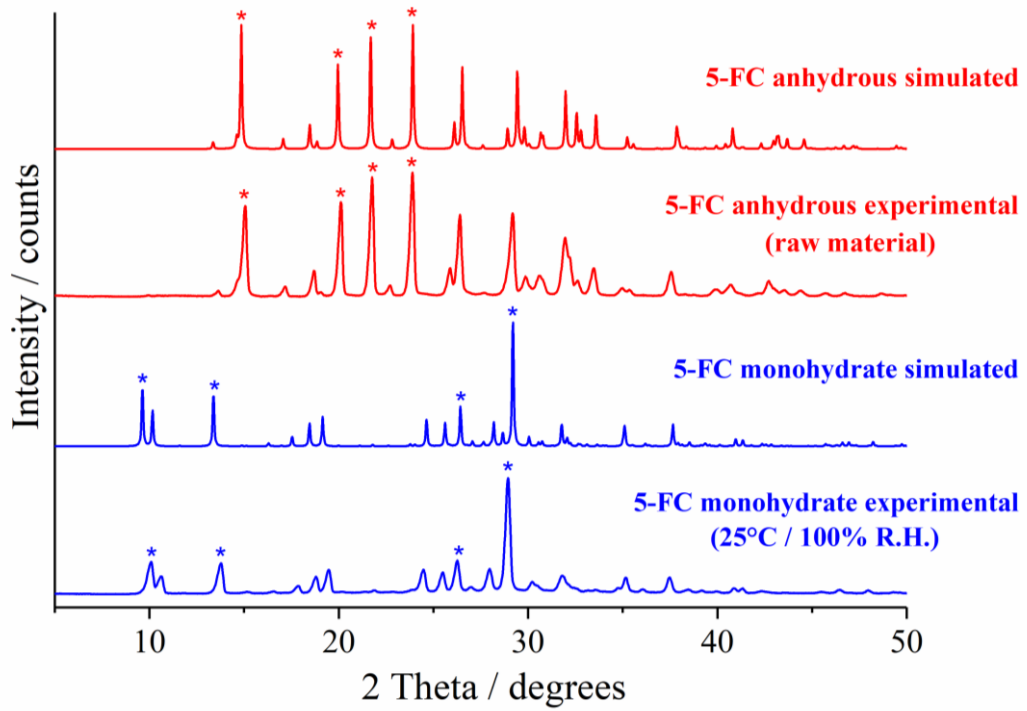

1

2 **Figure S11.** Powder X-ray diffraction patterns of 5-FC confirming that this API  
3 undergoes a phase transition from the anhydrous to the monohydrate form when  
4 exposed to humid environments.

5

6

7

8

9

10

11

12

13

14

15

16

17

18

19

20

a)

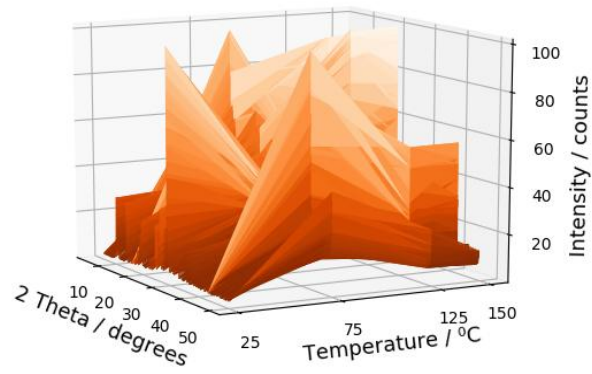

b)

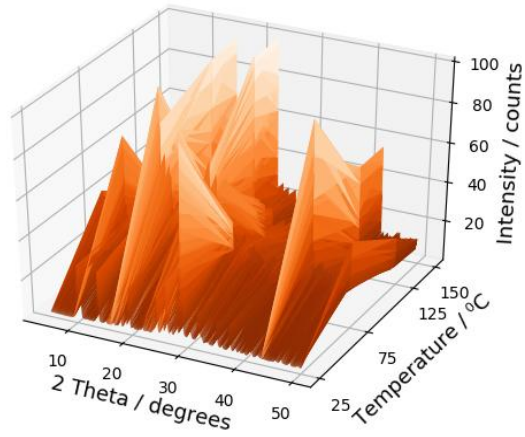

c)

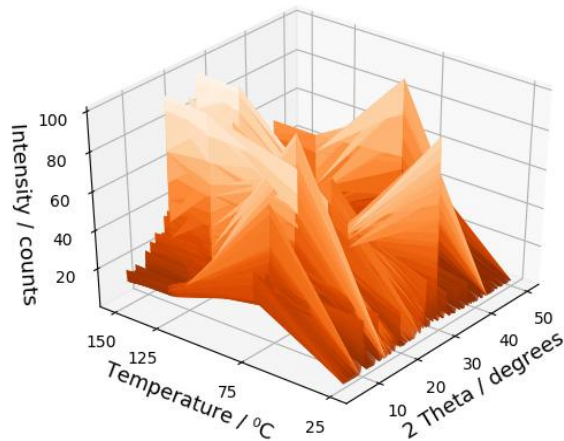

1

2 **Figure S12.** 3D surfaces generated through a script in Python from the 5-FC  
3 monohydrate patterns overlap collected during a VT-PXRD experiment.

4

5

6

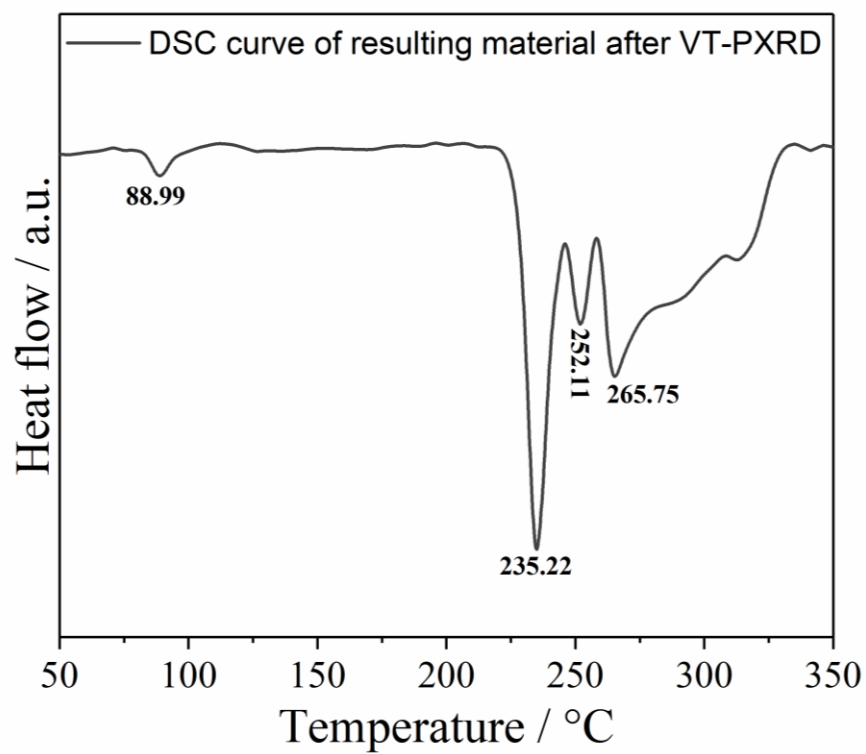

1

2 **Figure S13.** DSC curve of resulting material after VT-PXRD.

3

4

5

6

7

8

9

10

11

12

13

14

15

16

17

18

19

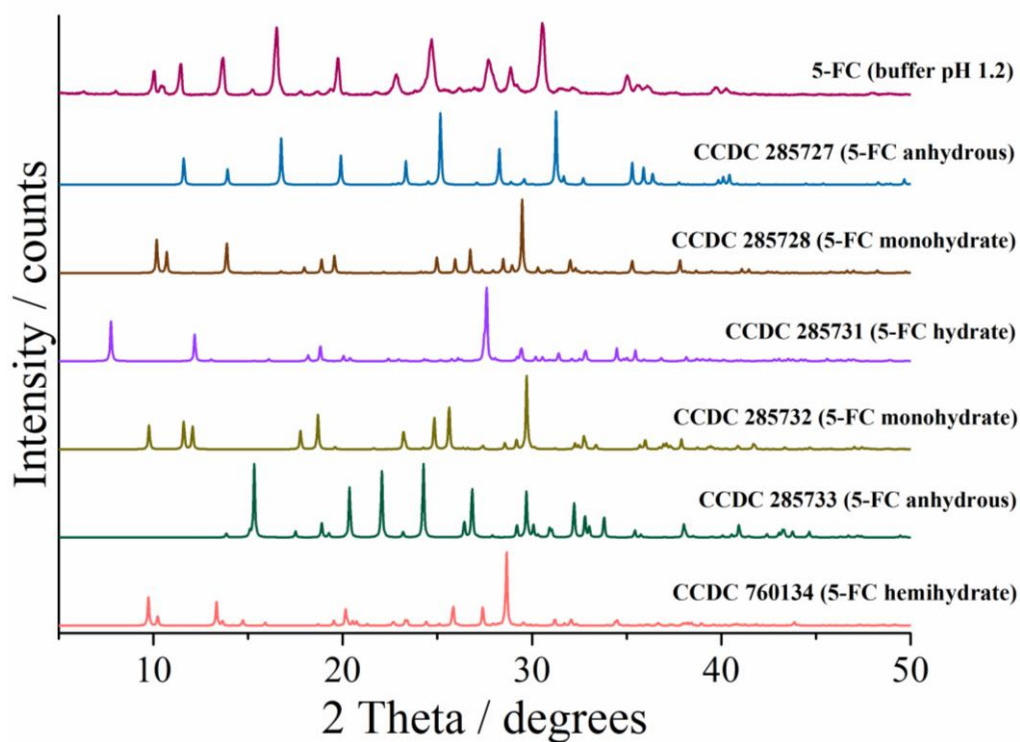

1

2 **Figure S14.** Powder X-ray diffraction patterns of 5-FC after solubility study (upper)  
3 and different solid forms of 5-FC anhydrous and hydrated reported in literature.

4

5

6

7

8

9

10

11

12

13

14

15

16

17

18

19

20

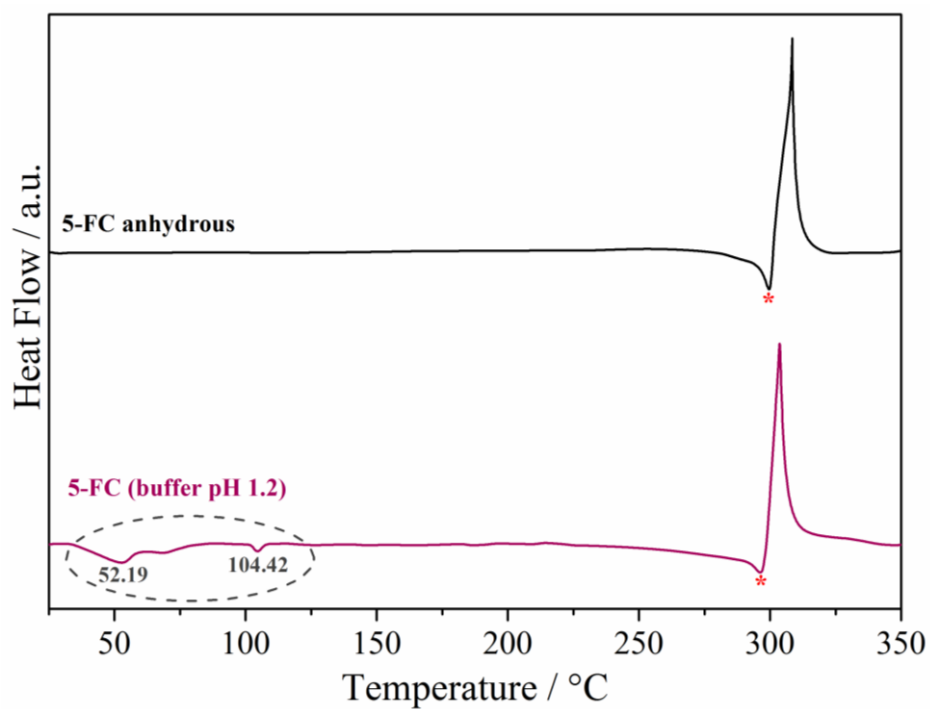

1  
2  
3  
4  
5  
6  
7  
8  
9  
10  
11  
12  
13  
14  
15  
16  
17  
18  
19  
20

**Figure S15.** DSC profiles of 5-FC before (black) and after (purple) the solubility study.

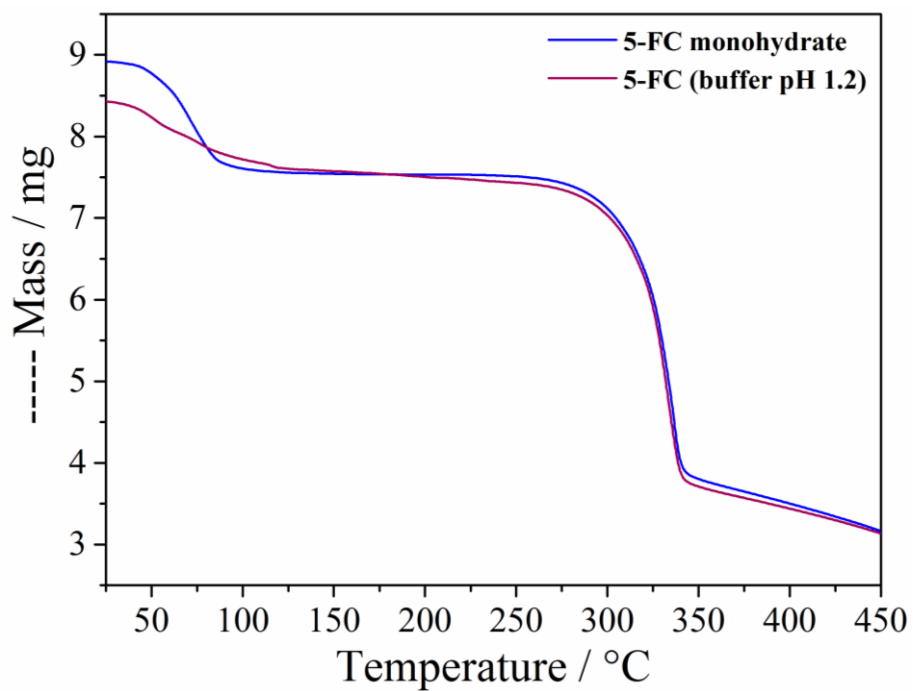

1

2 **Figure S16.** TGA profiles of 5-FC monohydrate (blue) and 5-FC anhydrous (purple)  
3 after the solubility study.

4

5

6

7

8

9

10

11

12

13

14

15

16

17

18

19

20

21



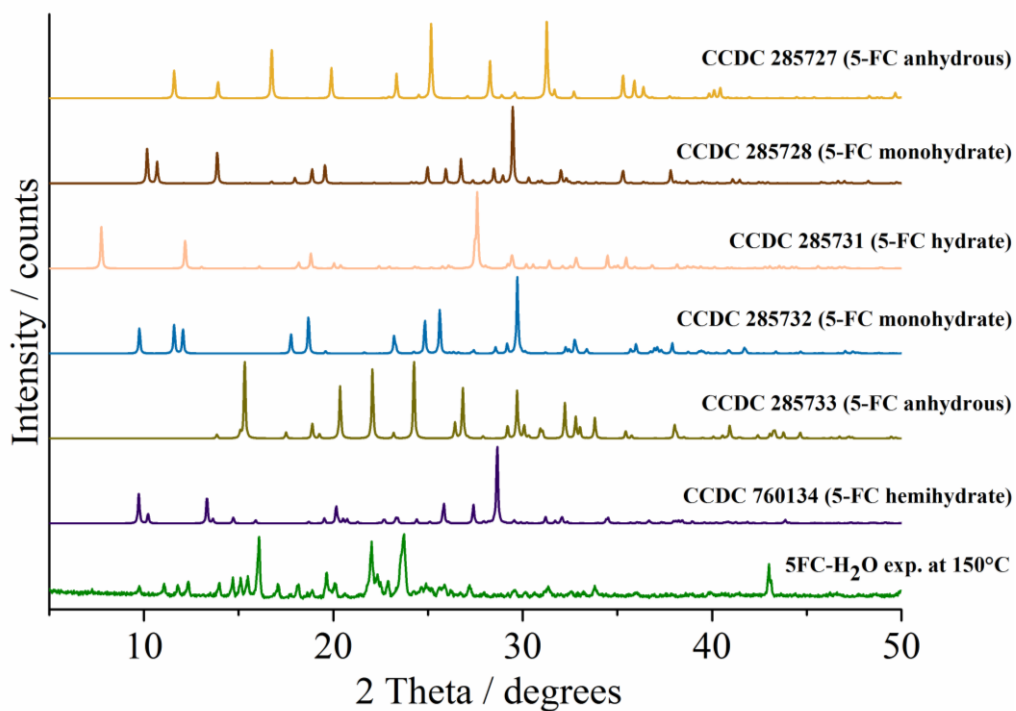

1

2 **Figure S17.** PXR D patterns of 5-FC (anhydrous, monohydrate, hydrate and  
 3 hemihydrate) structures confirming that the 5-FC monohydrate sample gives rise under  
 4 heating to a totally different crystalline phase that do not corresponds to any other  
 5 similar crystal structure deposited in the Cambridge Structure Database.

6

7

8

9

10

11

12

13

14

15

16

17

18

1 **Table S1.** Composition of the solution used for the preparing of the calibration curves  
2 and solubility determinations.

| <b>Hydrochloric Buffer (1000 mL)</b>                     |          |
|----------------------------------------------------------|----------|
| pH                                                       | 1.2      |
| 0.2 M HCl                                                | 322.5 mL |
| 0.2 M KCl (mL)                                           | 250 mL   |
| Deionized water to complete the 1000 mL volumetric flask |          |

3

4

5

6

7

8

9

10

11

12

13

14

15

16

17

18

19

20

21

22

23

1 **Table S2.** Standard solutions of 5-FC, caffeine and *p*-aminobenzoic acid used to  
2 construct the calibration curves.

| Concentration<br>5-FC<br>(mg mL <sup>-1</sup> ) | Absorbance<br>(281 nm) | Concentration<br>caffeine<br>(mg mL <sup>-1</sup> ) | Absorbance<br>(272.5 nm) | Concentration<br>PABA<br>(mg mL <sup>-1</sup> ) | Absorbance<br>(225.5 nm) |
|-------------------------------------------------|------------------------|-----------------------------------------------------|--------------------------|-------------------------------------------------|--------------------------|
| 0.0096                                          | 0.714                  | 0.01716                                             | 1.008                    | 0.01086                                         | 0.922                    |
| 0.0085                                          | 0.637                  | 0.01373                                             | 0.774                    | 0.00814                                         | 0.712                    |
| 0.0077                                          | 0.568                  | 0.01144                                             | 0.681                    | 0.00652                                         | 0.503                    |
| 0.0064                                          | 0.455                  | 0.00981                                             | 0.568                    | 0.00543                                         | 0.39                     |
| 0.0055                                          | 0.381                  | 0.00858                                             | 0.505                    | 0.00465                                         | 0.333                    |
| 0.0038                                          | 0.243                  | 0.00763                                             | 0.446                    | 0.00407                                         | 0.281                    |

3

4

5

6

7

8

9

10

11

12

13

14

15

16

17

18

19

20

21

22

23

1 **Table S3.** Regression coefficients for the calibration curves of 5-FC and the cocystal  
2 formers at buffer media, pH = 1.2.

| <b>Compound and Wavenumber</b> | <b>Linear Coefficient</b> | <b>Angular Coefficient</b> | <b>R<sup>2</sup></b> |
|--------------------------------|---------------------------|----------------------------|----------------------|
| 5-FC (281 nm)                  | -0.068                    | 10598 M <sup>-1</sup>      | 0.9988               |
| 5-FC (272.5 nm)                | -0.033                    | 7941.7 M <sup>-1</sup>     | 0.9976               |
| 5-FC (225.5 nm)                | -0.201                    | 7999.5 M <sup>-1</sup>     | 0.9901               |
| caffeine (281 nm)              | 0.005                     | 871.8 M <sup>-1</sup>      | 0.9941               |
| caffeine (272.5 nm)            | 0.005                     | 11228 M <sup>-1</sup>      | 0.9943               |
| PABA (281 nm)                  | 0.090                     | 1637.9 M <sup>-1</sup>     | 0.9903               |
| PABA (225.5 nm)                | -0.122                    | 13383 M <sup>-1</sup>      | 0.9909               |

3

4

5

6

7

8

9

10

11

12

13

14

15

16

17

18

19

1 **Table S4.** pH values measured after solubility.

| <b>Solution</b>        | <b>pH</b> |
|------------------------|-----------|
| pH (dissolution media) | 1.20      |
| pH (5-FC solution)     | 2.00      |
| pH (5FC-CAF solution)  | 1.50      |
| pH (5FC-PABA solution) | 2.20      |
| pH (5FC-CA solution)   | 1.40      |

2

3

4

5

6

7

8

9

10

11

12

13

14

15

16

17

18

19

20

21

22

23

24

1 **Table S5.** Geometric parameters of the intermolecular interactions for 5-FC organic  
 2 cocrystals.

| Interaction      | $d(\text{D}\cdots\text{A})$ (Å) | $d(\text{H}\cdots\text{A})$ (Å) | $\angle\text{D-H}\cdots\text{A}$ (°) | Symmetry codes       |
|------------------|---------------------------------|---------------------------------|--------------------------------------|----------------------|
| <b>5FC-CAF</b>   |                                 |                                 |                                      |                      |
| N1'-H1'...O21    | 3.382(2)                        | 2.772(2)                        | 129(2)                               | x,y,z                |
| N1'-H1'...N3     | 2.761(2)                        | 1.902(2)                        | 176(2)                               | x,y,z                |
| N41-H41A...O21'  | 2.983(2)                        | 2.134(3)                        | 169(2)                               | x,y,z                |
| N41-H41B...N7    | 3.022(2)                        | 2.174(2)                        | 168(2)                               | x,y,z                |
| N41'-H41D...N7'  | 3.047(2)                        | 2.197(2)                        | 169(2)                               | x,y,z                |
| C6'-H6'...O21    | 3.404(2)                        | 2.803(2)                        | 123(2)                               | x,y,z                |
| C7'-H7'...F51'   | 3.062(2)                        | 2.388(2)                        | 129(1)                               | x,y,z                |
| C7-H7...F51      | 3.067(2)                        | 2.399(2)                        | 128(1)                               | x,y,z                |
| C14-H14E...F51   | 3.743(2)                        | 2.796(2)                        | 168(1)                               | x+1,+y,+z            |
| N41'-H41C...O21  | 2.956(2)                        | 2.102(3)                        | 171(1)                               | x+1,+y,+z            |
| C14'-H41B...F51' | 3.701(2)                        | 2.788(2)                        | 159(1)                               | x+1,+y,+z            |
| N1-H1...O21'     | 3.390(2)                        | 2.786(2)                        | 128(1)                               | x-1,+y,+z            |
| C12'-H12B...O3'  | 3.582(2)                        | 2.661(2)                        | 161(1)                               | x-1,+y,+z            |
| C7-H7...O3       | 3.618(2)                        | 2.797(2)                        | 147(1)                               | x-1,+y,+z            |
| C6-H6...O21'     | 3.404(2)                        | 2.794(2)                        | 124(1)                               | x-1,+y,+z            |
| N1-H1...N3'      | 2.752(2)                        | 1.896(2)                        | 173(1)                               | x-1,+y,+z            |
| C7'-H7'...O3'    | 3.617(2)                        | 2.804(2)                        | 146(1)                               | x-1,+y,+z            |
| C12-H12E...O3    | 3.659(2)                        | 2.746(2)                        | 159(1)                               | x-1,+y,+z            |
| C13-H13F...O21   | 3.740(2)                        | 2.783(2)                        | 175(2)                               | -x+1,+y-1/2,-z+1/2   |
| C12'-H12A...N3   | 3.618(2)                        | 2.902(2)                        | 132(2)                               | -x+1,-y+1,-z+1       |
| C12'-H12A...N41  | 3.817(2)                        | 2.866(2)                        | 171(2)                               | -x+1,-y+1,-z+1       |
| C12'-H12C...N41  | 3.569(2)                        | 2.982(2)                        | 120(2)                               | -x+1,+y+1/2,-z+1/2   |
| C14-H14D...O3'   | 3.423(2)                        | 2.672(2)                        | 135(2)                               | -x+2,+y-1/2,-z+1/2   |
| C14-H14F...O4    | 3.498(2)                        | 2.657(2)                        | 146(2)                               | -x+1,-y,-z+1         |
| C14'-H14C...O3   | 3.514(2)                        | 2.626(2)                        | 154(2)                               | -x+2,+y+1/2,-z+1/2   |
| C13'-H13C...O21' | 3.689(2)                        | 2.732(2)                        | 175(2)                               | -x+2,-y+1,-z+1       |
| <b>5FC-PABA</b>  |                                 |                                 |                                      |                      |
| O2-H2...O21      | 3.278(3)                        | 2.777(2)                        | 121(1)                               | x,y,z                |
| O2-H2...N3       | 2.745(2)                        | 1.934(1)                        | 169(1)                               | x,y,z                |
| N1-H1...O21      | 2.771(2)                        | 1.912(2)                        | 177(2)                               | -x+1,-y+1,-z+2       |
| N41-H41A...O3    | 2.892(2)                        | 2.081(2)                        | 157(2)                               | x+1,+y,+z            |
| C9-H9'...F51     | 3.840(5)                        | 2.824(1)                        | 129(2)                               | -x+2,-y+1,-z+1       |
| N41-H41B...O3    | 2.941(2)                        | 2.107(2)                        | 163(1)                               | -x+2,-y+1,-z+1       |
| N4-H4A...O2      | 3.133(3)                        | 2.325(2)                        | 154(2)                               | x-1,-y+1/2+1,+z-1/2  |
| N4-H4B...O21     | 2.965(3)                        | 2.104(1)                        | 154(2)                               | x,-y+1/2+1,+z-1/2    |
| C6-H6...N4       | 3.453(3)                        | 2.713(2)                        | 137(2)                               | -x+1,+y-1/2,-z+1/2+1 |
| C12'-H12'...F51  | 3.553(6)                        | 2.634(1)                        | 170(2)                               | -x+2,+y+1/2,-z+1/2+1 |
| C12-H12'...F51   | 3.834(6)                        | 2.634(1)                        | 155(2)                               | -x+2,+y+1/2,-z+1/2+1 |
| C9-H9A...F51     | 3.421(4)                        | 2.565(1)                        | 153(2)                               | -x+1,-y+1,-z+1       |

|               |          |          |        |                |
|---------------|----------|----------|--------|----------------|
| C9'-H9'...F51 | 3.544(5) | 2.822(2) | 135(1) | -x+1,-y+1,-z+1 |
| C9'-H9A...F51 | 3.544(5) | 2.565(1) | 126(2) | -x+1,-y+1,-z+1 |

**5FC-CA**

|                |          |          |        |               |
|----------------|----------|----------|--------|---------------|
| O2-H2...O21    | 2.618(2) | 1.804(2) | 171(2) | x,y,z         |
| N1-H1...O21    | 2.792(2) | 1.936(2) | 173(2) | x,y,z         |
| C7-H7...O3     | 3.150(2) | 2.312(1) | 150(2) | x,y,z         |
| N41-H41B...O2  | 2.810(2) | 2.217(1) | 126(2) | -x+1,-y,-z+1  |
| N41-H41A...N3  | 2.981(2) | 2.129(1) | 172(2) | -x+1,-y,-z+1  |
| N41-H41A...N41 | 3.631(2) | 2.970(1) | 136(2) | -x+1,-y,-z+1  |
| C9-H9B...O3    | 3.682(2) | 2.804(1) | 151(2) | x-1,+y,+z     |
| C11-H11B...O3  | 3.674(2) | 2.802(1) | 150(2) | x-1,+y,+z     |
| C14-H14B...F51 | 3.631(3) | 2.846(1) | 138(2) | x-1,+y+1,+z-1 |

- 1
- 2
- 3
- 4
- 5
- 6
- 7
- 8
- 9
- 10
- 11
- 12
- 13
- 14
- 15
- 16
- 17
- 18
- 19
- 20
- 21
- 22

1 **Table S6.** Main FT-IR and FT-Raman bands ( $\text{cm}^{-1}$ ) for 5-FC and 5-FC cocrystals

| 5-FC |       | 5FC-CAF |       | 5FC-PABA |       | 5FC-CA |       | Assignment                          |
|------|-------|---------|-------|----------|-------|--------|-------|-------------------------------------|
| IR   | Raman | IR      | Raman | IR       | Raman | IR     | Raman |                                     |
| -    | -     | -       | -     | 3476     | -     | 3458   | -     | $\nu(\text{OH})_{\text{carboxyl}}$  |
| -    | -     | -       | -     | 3442     | -     | -      | -     | $\nu(\text{NH})_{\text{PABA}}$      |
| -    | -     | -       | -     | 3397     | -     | -      | -     | $\nu(\text{NH})_{\text{INH}}$       |
| 3375 | -     | 3280    | -     | 3386     | -     | 3326   | -     | $\nu(\text{NH})_{\text{cytosine}}$  |
| 3094 | 3093  | 3072    | 3073  | 3073     | 3076  | 3080   | 3085  | $\nu(\text{CH})_{\text{aromatic}}$  |
| -    | -     | 2960    | 2956  | -        | -     | 2922   | 2877  | $\nu(\text{CH})_{\text{aliphatic}}$ |
| -    | -     | -       | -     | 1675     | 1703  | 1720   | 1722  | $\nu(\text{CO})_{\text{carboxyl}}$  |
| 1682 | 1677  | 1675    | 1683  | 1661     | 1643  | 1687   | 1679  | $\nu(\text{CO})_{\text{cytosine}}$  |
| -    | -     | 1650    | 1630  | -        | -     | -      | -     | $\nu(\text{CO})_{\text{amide}}$     |
| 1644 | 1630  | 1648    | 1604  | 1616     | 1606  | 1629   | 1620  | $\delta(\text{NH})$                 |
| 1337 | 1340  | 1332    | 1328  | 1341     | 1344  | 1352   | 1349  | $\nu(\text{CN})_{\text{cytosine}}$  |
| 1227 | 1236  | 1223    | 1236  | 1222     | 1232  | 1227   | 1234  | $\nu(\text{CF})$                    |

2  $\nu$  = stretching, as = antisymmetric, s = symmetric,  $\delta$  = angular deformation.

3

4

5

6

7

8

9

10

11

12

13

14

15

16

17

18

19

20

21

22

23



1 **Table S7.** Solubility values of the four compounds.

| <b>Compound</b> | <b>Solubility (mmol mL<sup>-1</sup>)</b> |
|-----------------|------------------------------------------|
| 5-FC raw        | 0.153 ± 0.007                            |
| 5FC-CAF         | 0.097 ± 0.002                            |
| 5FC-PABA        | 0.096 ± 0.009                            |
| 5FC-CA          | 0.087 ± 0.005                            |

2
